# Supplementary material for: “A Safe Space for Sharing Feelings”: Perspectives of Children with Lived Experiences of Anxiety on Social Robots
Source: MDPI journal article supplement (doi:10.3390/mti7120118), 2023-12-15
Supplement: s1 [file s1]

## Supplementary Table

**Table S1.** Themes within the discussion of social robot uses for practical, non-social tasks

| Theme                        | Example                                                                              | Frequency      |
|------------------------------|--------------------------------------------------------------------------------------|----------------|
| Facilitate entertainment     | "Play music." (AMR_W09)                                                              | 8/10 workshops |
| Safety                       | "Calls for help when someone is in trouble." (Adult_W03)                             | 7/10 workshops |
| Provide information          | "Answer questions." (AMR_W01)                                                        | 6/10 workshops |
| Reminders                    | "We use Google Home for reminders, but it could be cuter with robots." (Adult32_W07) | 6/10 workshops |
| Cooking, cleaning, housework | "Clean my house." (Child11_W03)                                                      | 5/10 workshops |
| Homework, paper-work         | "Help me with my schoolwork." (AMR_W07)                                              | 4/10 workshops |
| Activities of daily living   | "Help me with stuff that is hard, like getting ready for the day." (Child31_W04)     | 2/10 workshops |
| Serve                        | "It could get some food from the fridge." (Child07_W02)                              | 2/10 workshops |

This table covers non-social themes that emerged from our content analysis. Serving, providing homework support, and assisting with activities of daily living were applications that were mentioned in fewer than half of the workshops. Doing housework, providing information, maintaining safety, giving reminders, and entertaining were all uses that came up frequently – in 50% of workshops or more.
